# Supplementary material for: Defect- and Interface-Induced Dielectric Loss in ZnFe2O4/ZnO/C Electromagnetic Wave Absorber
Source: MDPI journal article supplement (doi:10.3390/nano12162871), 2022-08-20
Supplement: s1 [file s1]

# Defect- and Interface-Induced Dielectric Loss in ZnFe<sub>2</sub>O<sub>4</sub>/ZnO/C Electromagnetic Wave Absorber

Hao Shen <sup>1</sup>, Zhen Wang <sup>1</sup>, Chun Wang <sup>2</sup>, Pengfei Zou <sup>1</sup>, Zhaoyang Hou <sup>1</sup>, Chunlong Xu <sup>1,\*</sup> and Hongjing Wu <sup>3,\*</sup>

<sup>1</sup> Department of Applied Physics, School of Science, Chang'an University, Xi'an 710064, China

<sup>2</sup> School of Science, Xi'an Shiyou University, Xi'an 710064, China

<sup>3</sup> MOE Key Laboratory of Material Physics and Chemistry Under Extraordinary Conditions, School of Physical Science and Technology, Northwestern Polytechnical University, Xi'an 710072, China

\* Correspondence: chunlongxu@chd.edu.cn (C.X.); wuhongjing@nwpu.edu.cn (H.W.)

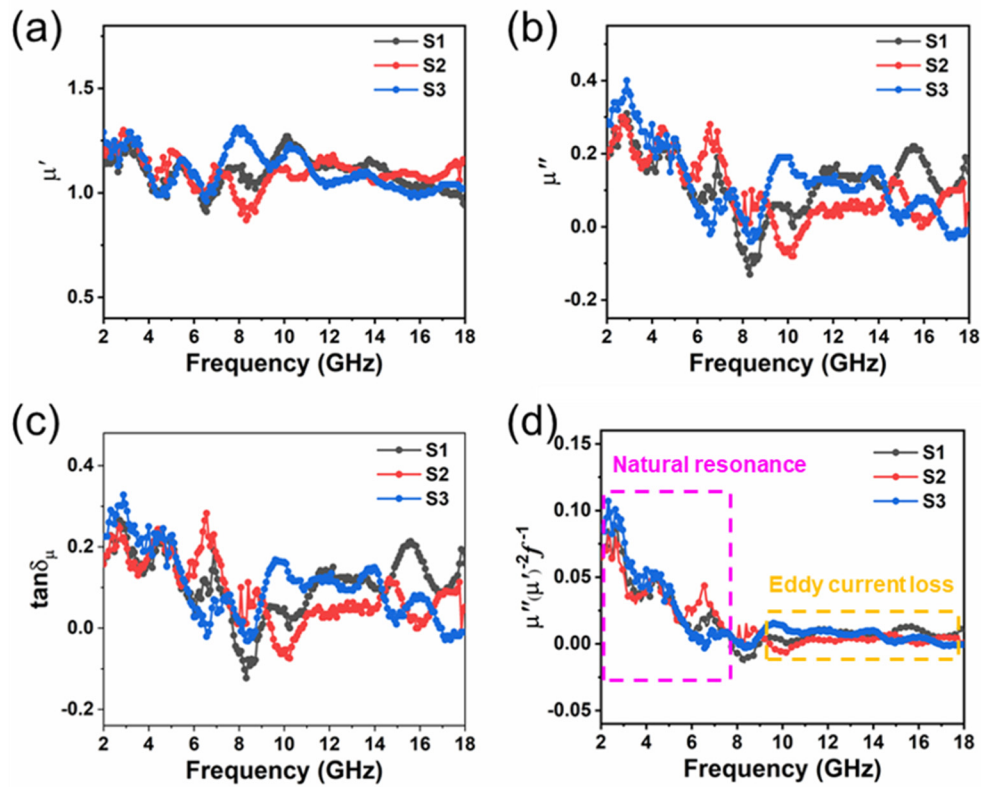

Figure S1. Frequency dependence of  $\mu'$  (a),  $\mu''$  (b), magnetic loss tangents (c) and  $C_0$  values (d) of S1–S3.

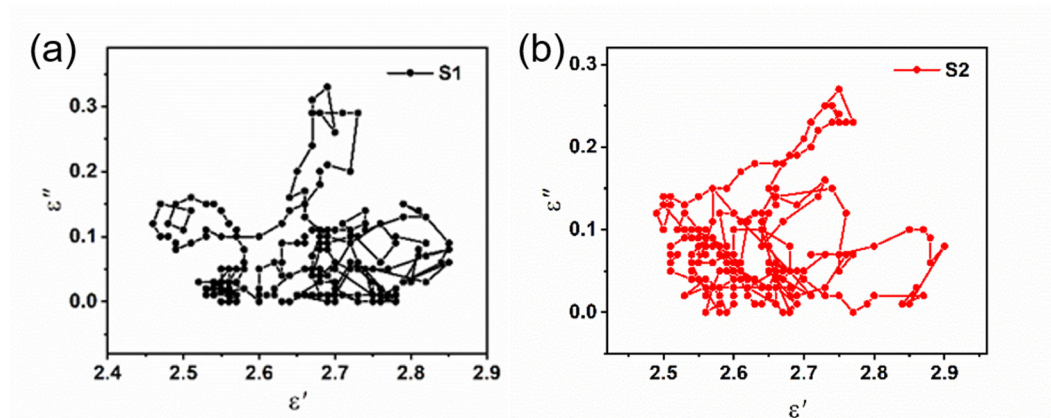

Figure S2. Cole-Cole plots of S1 (a) and S2 (b).

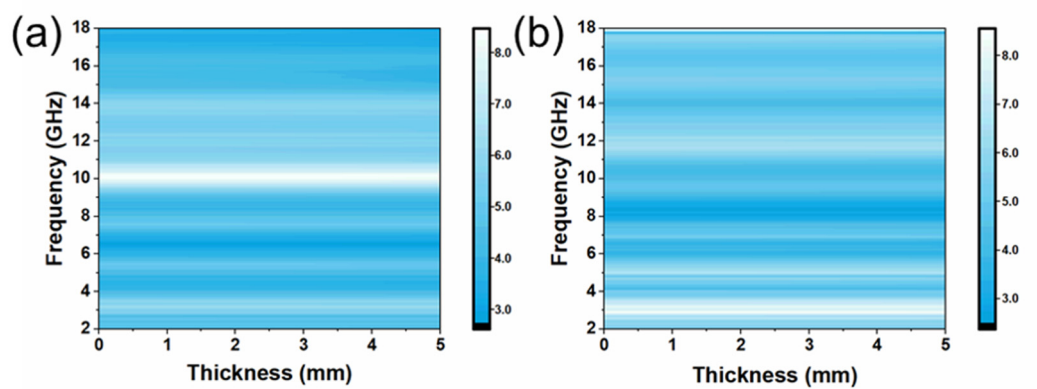

Figure S3. The calculated delta value maps of S1 (a) and S2 (b).
